# Supplementary material for: Emerging Treatment Options for Sarcopenia in Chronic Liver Disease
Source: Life (Basel). 2021 Mar 17;11(3):250. doi: 10.3390/life11030250 (PMC8002763; doi:10.3390/life11030250)
Supplement: Supplementary file 1 [file life-11-00250-s001.pdf]

**Table S1.** Current and emerging treatment options for sarcopenia observed in clinical trials.

| Target or Mechanism of action | Drug                                           | Sponsor/Collaborator             | Clinical Phase | Indication                                          | Status     | NCT number  | Year  |      | Title                                                                                                                                                                                                                                                                                   | Reference           |
|-------------------------------|------------------------------------------------|----------------------------------|----------------|-----------------------------------------------------|------------|-------------|-------|------|-----------------------------------------------------------------------------------------------------------------------------------------------------------------------------------------------------------------------------------------------------------------------------------------|---------------------|
|                               |                                                |                                  |                |                                                     |            |             | Start | End  |                                                                                                                                                                                                                                                                                         |                     |
| Activin receptor inhibitor    | Bimagrumab (BYM338)                            | Novartis Pharmaceuticals         | 2              | Sarcopenia                                          | Completed  | NCT01601600 | 2012  | 2013 | A Randomized, Double-blind, Placebo-controlled Multi-center Study to Assess the Effects of BYM338 on Skeletal Muscle in Sarcopenic Adults With Mobility Limitations                                                                                                                     | <a href="#">[1]</a> |
| Activin receptor inhibitor    | Bimagrumab (BYM338)                            | Novartis Pharmaceuticals         | 2              | Sarcopenia                                          | Completed  | NCT02333331 | 2014  | 2018 | A 28 Week, Randomized, Double-blind, Placebo-controlled, Two-part, Multi-center, Parallel Group Dose Range Finding Study to Assess the Effect of Monthly Doses of Bimagrumab 70, 210, and 700 mg on Skeletal Muscle Strength and Function in Older Adults With Sarcopenia (InvestiGAIT) | <a href="#">[2]</a> |
| Activin receptor inhibitor    | Bimagrumab (BYM338)                            | Novartis Pharmaceuticals         | 2              | Muscle Wasting (Atrophy) After Hip Fracture Surgery | Completed  | NCT02152761 | 2014  | 2018 | A 24-week Double-blind Treatment and 24-week Follow-up, Randomized, Multicenter, Placebo-controlled, Phase IIa/IIb Study to Evaluate Safety and Efficacy of i.v. Bimagrumab on Total Lean Body Mass and Physical Performance in Patients After Surgical Treatment of Hip Fracture       | NA                  |
| Activin receptor inhibitor    | Bimagrumab (BYM338)                            | Novartis Pharmaceuticals         | 2              | Sarcopenia                                          | Completed  | NCT02468674 | 2015  | 2018 | A 24 Week Off Drug Extension, Parallel Group, Study Assessing Durability of Effect on Skeletal Muscle Strength and Function Following a 6-month Double-blind, Placebo Controlled Study Evaluating Bimagrumab in Older Adults With Sarcopenia (InvestiGAIT Extension)                    | NA                  |
| Activin receptor inhibitor    | Bimagrumab (BYM338)                            | Novartis Pharmaceuticals         | 2              | Type 2 diabetes with obesity                        | Completed  | NCT03005288 | 2017  | 2019 | A Randomized, Subject- and Investigator-blinded, Placebo Controlled Study to Assess the Safety, Pharmacokinetics and Efficacy of Intravenous Bimagrumab in Overweight and Obese Patients With Type 2 Diabetes                                                                           | <a href="#">[3]</a> |
| Myostatin inhibitor           | Trevogrumab (REGN1033)                         | Regeneron Pharmaceuticals/Sanofi | 2              | Sarcopenia                                          | Completed  | NCT01963598 | 2013  | 2015 | A Randomized, Double-blind, Placebo-controlled, Multi-center Study of the Safety and Efficacy of 3-month Subcutaneous REGN1033 Treatment in Patients With Sarcopenia                                                                                                                    | NA                  |
| Myostatin inhibitor           | Trevogrumab (REGN1033), REGN2477               | Regeneron Pharmaceuticals        | 1              | Healthy volunteers                                  | Completed  | NCT02943239 | 2016  | 2019 | A Randomized, Double-Blind, Placebo-Controlled, Ascending Dose Study to Assess the Safety, Tolerability, and Pharmacodynamic Effects of REGN2477 Alone and in Combination With REGN1033 in Healthy Postmenopausal Women and Healthy Adult Men                                           | NA                  |
| Myostatin inhibitor           | Domagrozumab (PF-06252616)                     | Pfizer                           | 2              | Duchenne Muscular Dystrophy                         | Terminated | NCT02310763 | 2014  | 2018 | A Phase 2 Study to Evaluate the Safety, Efficacy, Pharmacokinetics and Pharmacodynamics of PF-06252616 in Duchenne Muscular Dystrophy                                                                                                                                                   | <a href="#">[4]</a> |
| Myostatin inhibitor           | Domagrozumab (PF-06252616)                     | Pfizer                           | 2              | Duchenne Muscular Dystrophy                         | Terminated | NCT02907619 | 2016  | 2018 | An Multicenter, Open-label Extension Study To Evaluate Safety Of PF-06252616 In Boys With Duchenne Muscular Dystrophy                                                                                                                                                                   | <a href="#">[4]</a> |
| Myostatin inhibitor           | Domagrozumab (PF-06252616)                     | Kathryn Wagner/Pfizer            | 1b/2           | Limb Girdle Muscular Dystrophy 2I (LGMD2I)          | Completed  | NCT02841267 | 2016  | 2019 | A Phase 1b/2, Open-Label, Multiple Ascending Dose Study to Evaluate the Safety, Tolerability, Efficacy, Pharmacokinetics and Pharmacodynamics of PF-06252616 in Ambulatory Participants With LGMD2I                                                                                     | <a href="#">[5]</a> |
| Myostatin inhibitor           | ACE-083                                        | Acceleron Pharma, Inc.           | 2              | Facioscapulohumeral Muscular Dystrophy (FSHD)       | Terminated | NCT02927080 | 2016  | 2019 | A Phase 2 Randomized, Double-Blind, Placebo-Controlled Study of ACE-083 in Patients With Facioscapulohumeral Muscular Dystrophy                                                                                                                                                         | NA                  |
| Myostatin inhibitor           | ACE-083                                        | Acceleron Pharma, Inc.           | 2              | Charcot-Marie-Tooth (CMT)                           | Terminated | NCT03124459 | 2017  | 2020 | A Phase 2 Randomized, Double-Blind, Placebo-Controlled Study of ACE-083 in Patients With Charcot-Marie-Tooth Disease Types 1 and X                                                                                                                                                      | NA                  |
| Myostatin inhibitor           | ACE-2494                                       | Acceleron Pharma, Inc.           | 1              | Healthy Volunteers                                  | Completed  | NCT03478319 | 2018  | 2019 | A Phase 1, Randomized, Double-Blind, Placebo-Controlled, Dose-Ranging Study to Evaluate the Safety, Tolerability, Pharmacokinetics, and Pharmacodynamic Effects of ACE-2494 in Healthy Postmenopausal Women                                                                             | NA                  |
| Myostatin inhibitor           | RO7239361                                      | Hoffmann-La Roche                | 2              | Duchenne Muscular Dystrophy                         | Completed  | NCT03039686 | 2017  | 2020 | A Randomized, Double Blind, Placebo-Controlled, Study to Assess the Efficacy, Safety, and Tolerability of RO7239361 in Ambulatory Boys With Duchenne Muscular Dystrophy                                                                                                                 | NA                  |
| Testosterone                  | Testosterone, Recombinant human growth hormone | NIA                              | 2              | Sarcopenia                                          | Completed  | NCT00183040 | 2002  | 2007 | Hormonal Regulators of Muscle and Metabolism in Aging (HORMA)                                                                                                                                                                                                                           | <a href="#">[6]</a> |

|                 |                                                                                         |                                                                                       |   |                                                                        |                        |             |      |         |                                                                                                                                                                                                                                                                                                                                        |                      |
|-----------------|-----------------------------------------------------------------------------------------|---------------------------------------------------------------------------------------|---|------------------------------------------------------------------------|------------------------|-------------|------|---------|----------------------------------------------------------------------------------------------------------------------------------------------------------------------------------------------------------------------------------------------------------------------------------------------------------------------------------------|----------------------|
| Testosterone    | Testosterone, Vitamin D                                                                 | University of Zurich/Besins Healthcare, Dr. Wild & Co.                                | 3 | Hypogonadism, Pre-frail Seniors                                        | Terminated             | NCT02419105 | 2015 | 2020    | Effects of Transdermal Testosterone and/or Monthly Vitamin D on Fall Risk in Pre-frail Hypogonadal Seniors (Double Blind, 2x2 Factorial, Randomized Placebo-Controlled Clinical Trial)                                                                                                                                                 | NA                   |
| Testosterone    | Testosterone, Gonadotropin-releasing hormone agonist (Goserelin; sex hormone inhibitor) | University of Nottingham                                                              | 3 | Sarcopenia                                                             | Unknown                | NCT03054168 | 2016 | 2019    | The Regulation of Skeletal Muscle Protein Synthesis by Systemic Hormones and Its Influence on Ageing and Anabolic Resistance                                                                                                                                                                                                           | NA                   |
| Testosterone    | Testosterone, Exercise                                                                  | Washington University School of Medicine                                              | 3 | Hip fracture, Sarcopenia                                               | Recruiting             | NCT02938923 | 2017 | Ongoing | Combining Testosterone Therapy and Exercise to Improve Function Post Hip Fracture                                                                                                                                                                                                                                                      | NA                   |
| Testosterone    | Testosterone enanthate, finasteride (5-alpha reductase inhibitor)                       | VA Office of Research and Development/Endo Pharmaceuticals, Merck Sharp & Dohme Corp. | 2 | Sarcopenia                                                             | Completed              | NCT00475501 | 2007 | 2014    | 5-Alpha Reductase and Anabolic Effects of Testosterone                                                                                                                                                                                                                                                                                 | <a href="#">[7]</a>  |
| Testosterone    | Testosterone, Anastrozole (Aromatase inhibitor)                                         | NIA                                                                                   | 2 | Sarcopenia                                                             | Completed              | NCT00104572 | 2004 | 2015    | The Effects of Aromatase Inhibition and Testosterone Replacement in Sex Steroids, Pituitary Hormones, Markers of Bone Turnover, Muscle Strength, and Cognition in Older Men                                                                                                                                                            | <a href="#">[8]</a>  |
| SARM            | MK-0773                                                                                 | Merck Sharp & Dohme Corp.                                                             | 2 | Sarcopenia                                                             | Completed              | NCT00529659 | 2007 | 2009    | A Phase IIa Randomized, Placebo-Controlled Clinical Trial to Study the Efficacy and Safety of MK-0773 in Patients With Sarcopenia                                                                                                                                                                                                      | <a href="#">[9]</a>  |
| SARM            | Ligandrol (LGD-4033/VK5211)                                                             | Viking Therapeutics, Inc.                                                             | 2 | Hip Fractures                                                          | Completed              | NCT02578095 | 2015 | 2018    | A Phase II, Randomized, Double-Blind, Parallel Group, Placebo- Controlled, Multi-Center Study to Explore the Efficacy, Safety and Tolerability of VK5211 in Subjects With Acute Hip Fracture                                                                                                                                           | NA                   |
| SARM            | LY2452473                                                                               | Dana-Farber Cancer Institute/National Institute of Nursing Research                   | 2 | Prostate Cancer                                                        | Completed              | NCT02499497 | 2016 | 2020    | A Selective Androgen Receptor Modulator for Symptom Management in Prostate Cancer                                                                                                                                                                                                                                                      | NA                   |
| SARM            | Enobosarm (GTx-024)                                                                     | GTx                                                                                   | 2 | Stress Urinary Incontinence                                            | Completed              | NCT03241342 | 2017 | 2018    | Double-Blind, Placebo-Controlled, Parallel Design, Phase 2 Study to Assess Clinical Activity and Safety of Enobosarm (GTx-024) in Postmenopausal Women With Stress Urinary Incontinence                                                                                                                                                | NA                   |
| SARM            | Enobosarm (GTx-024)                                                                     | City of Hope Medical Center/National Cancer Institute                                 | 2 | Androgen Receptor Positive/Metastatic Triple-Negative Breast Carcinoma | Active, not recruiting | NCT02971761 | 2017 | Ongoing | A Phase 2 Clinical Trial of the Combination of Pembrolizumab and Selective Androgen Receptor Modulator GTx-024 in Patients With Metastatic Androgen Receptor Positive Triple Negative Breast Cancer                                                                                                                                    | <a href="#">[10]</a> |
| SARM            | GSK2881078                                                                              | GlaxoSmithKline/Parexel                                                               | 2 | Cachexia                                                               | Completed              | NCT03359473 | 2018 | 2019    | A Randomized, Double-blind (Sponsor Unblind), Placebo-controlled, Multi-centred Phase IIa Study to Evaluate the Safety and Efficacy of 13 Weeks of Once Daily Oral Dosing of the Selective Androgen Receptor Modulator GSK2881078 in Older Men and Post Menopausal Women With COPD and Muscle Weakness, Participating in Home Exercise | NA                   |
| DHEA            | DHEA                                                                                    | Washington University School of Medicine                                              | 3 | Sarcopenia, osteopenia                                                 | Completed              | NCT00205686 | 2001 | 2005    | DHEA+Exercise-Effect on Sarcopenia and Osteopenia of Aging                                                                                                                                                                                                                                                                             | <a href="#">[11]</a> |
| Ghrelin         | Ghrelin                                                                                 | University of Pennsylvania                                                            | 2 | Sarcopenia, Frailty Syndrome                                           | Completed              | NCT01898611 | 2013 | 2016    | Ghrelin Plus Strength Training in Frail Elderly Study                                                                                                                                                                                                                                                                                  | NA                   |
| Ghrelin         | Anamorelin Hydrochloride                                                                | Tufts University/NIAMS                                                                | 1 | Sarcopenia, Osteopenia                                                 | Recruiting             | NCT04021706 | 2019 | Ongoing | Effect of a Ghrelin Receptor Agonist on Muscle and Bone                                                                                                                                                                                                                                                                                | NA                   |
| GH secretagogue | ibutamoren mesylate (MK-0677)                                                           | University of Virginia                                                                | 2 | Aging                                                                  | Completed              | NCT00474279 | 1998 | 2004    | Effects of an Oral GH Secretagogue (MK-677) on Body Composition and Functional Ability of Older Adults                                                                                                                                                                                                                                 | <a href="#">[12]</a> |
| GH secretagogue | ibutamoren mesylate (MK-0677)                                                           | Merck Sharp & Dohme Corp.                                                             | 2 | Hip fracture                                                           | Terminated             | NCT00128115 | 2005 | 2007    | Treatment of Sarcopenia in Post-Hip Fracture Patients (0677-032)                                                                                                                                                                                                                                                                       | <a href="#">[13]</a> |
| Insulin         | Insulin Regular, L-NMMA, Sodium Nitroprusside                                           | The University of Texas Medical Branch, Galveston/NIA                                 | 1 | Sarcopenia                                                             | Completed              | NCT00690534 | 2005 | 2012    | Insulin and Sarcopenia in the Elderly                                                                                                                                                                                                                                                                                                  | NA                   |

|                                                           |                                            |                                                                                                                                         |    |                                          |                        |             |      |         |                                                                                                                                                                                                  |                         |
|-----------------------------------------------------------|--------------------------------------------|-----------------------------------------------------------------------------------------------------------------------------------------|----|------------------------------------------|------------------------|-------------|------|---------|--------------------------------------------------------------------------------------------------------------------------------------------------------------------------------------------------|-------------------------|
| Insulin/IGF-1 signaling                                   | Ursolic Acid                               | Pusan National University Hospital                                                                                                      | 2  | Sarcopenia                               | Completed              | NCT02401113 | 2014 | 2015    | Effect of Ursolic Acid of Loquat Extract on Function of Muscle in Human                                                                                                                          | <a href="#">[14]</a>    |
| Mas receptor activator                                    | BIO101 (Sarconeos)                         | Biophytis                                                                                                                               | 2  | Sarcopenia                               | Active, not recruiting | NCT03452488 | 2018 | 2021    | Safety and Efficacy of BIO-101 Oral Administration to Patients Suffering From Age-related SARCopenia, Including Sarcopenic Obesity, Aged ≥65 Years and at Risk of Mobility Disability (SARA-INT) | NA                      |
| AMPK activation/mTOR inhibition                           | Metformin                                  | VA Office of Research and Development/Oregon Health and Science University                                                              | 2  | Sarcopenia, Prediabetes                  | Completed              | NCT01804049 | 2014 | 2018    | Metformin and Muscle in Insulin-resistant Older Veterans                                                                                                                                         | NA                      |
| AMPK activation/mTOR inhibition                           | Metformin                                  | The University of Texas Health Science Center at San Antonio/NIA                                                                        | 2  | Frailty                                  | Recruiting             | NCT02570672 | 2016 | Ongoing | Metformin for Preventing Frailty in High-risk Older Adults                                                                                                                                       | NA                      |
| AMPK activation/mTOR inhibition                           | Metformin                                  | University of New Mexico                                                                                                                | 3  | Prediabetes, Aging                       | Active, not recruiting | NCT03309007 | 2017 | Ongoing | A Double-Blind, Placebo-Controlled Trial of Anti-Aging, Pro-Autophagy Effects of Metformin in Adults With Prediabetes                                                                            | NA                      |
| AT1 receptor inhibitor                                    | Losartan                                   | Johns Hopkins University/NIH, NIA                                                                                                       | 2  | Sarcopenia                               | Completed              | NCT01989793 | 2013 | 2016    | A Study of Muscle Strength Maintenance in Older Adults                                                                                                                                           | <a href="#">[15,16]</a> |
| AT1 receptor inhibitor                                    | Losartan                                   | University of Florida/NIA, Abbott                                                                                                       | 2  | Inflammation                             | Completed              | NCT02676466 | 2016 | 2018    | The ENRGISE (ENabling Reduction of Low-Grade Inflammation in SEniors) Pilot Study                                                                                                                | <a href="#">[17]</a>    |
| AT1 receptor inhibitor                                    | Losartan, Perindopril, hydrochlorothiazide | University of Alabama at Birmingham/University of Colorado, Translational Research Institute for Metabolism and Diabetes, Advent Health | 2  | Hypertension, Aging, Sedentary lifestyle | Recruiting             | NCT03295734 | 2018 | Ongoing | ACES - ACE Inhibitors Combined With Exercise for Seniors With Hypertension                                                                                                                       | <a href="#">[18]</a>    |
| Fast skeletal muscle troponin activator                   | rel-desemtiv (CK-2127107)                  | Astellas Pharma Global Development, Inc./Cytokinetics                                                                                   | 1b | Mobility Limitation                      | Terminated             | NCT03065959 | 2017 | 2018    | A Phase 1b Study to Assess the Anti-fatigability Effect of CK-2127107 in Elderly Male and Female Subjects With Limitations in Mobility                                                           | NA                      |
| mTORC1 inhibitor, relaxing smooth muscle of blood vessels | Rapamycin, Sodium nitroprusside            | The University of Texas Medical Branch, Galveston/NIAMS                                                                                 | 1  | Sarcopenia                               | Completed              | NCT00891696 | 2009 | 2015    | Nutritional and Contractile Regulation of Muscle Growth (Cycle 2)                                                                                                                                | NA                      |
| Myoblast differentiation                                  | Cetylpyridinium Chloride                   | Seoul National University Hospital                                                                                                      | 1  | Sarcopenia                               | Unknown                | NCT02575235 | 2015 | 2016    | Randomized, Double Blinded, Placebo-controlled Trial to Assess the Preventive Effects of Cetylpyridinium Chloride on Sarcopenia                                                                  | NA                      |
| Oxytocin                                                  | Oxytocin nasal spray                       | Sara Espinoza/The University of Texas                                                                                                   | 2  | Sarcopenic obesity                       | Completed              | NCT03119610 | 2017 | 2019    | The Physiologic Effects of Intranasal Oxytocin on Sarcopenic Obesity                                                                                                                             | NA                      |
| Vitamin D analogue                                        | Alfacalcidol                               | Indonesia University                                                                                                                    | 3  | Muscle Weakness                          | Completed              | NCT02327091 | 2012 | 2012    | Phase 3 Study of Vitamin D Analog (Alfacalcidol) on Muscle Strength in Elderly Indonesian Women Who Have Low Handgrip Strength                                                                   | NA                      |

Data were presented in the Clinicaltrials.gov on 1 Feb 2021.

Abbreviations: National Institute on Aging, NIA; National Institutes of Health, NIH; National Institute of Arthritis and Musculoskeletal and Skin Diseases, NIAMS; Dehydroepiandrosterone, DHEA; Growth hormone, GH; Insulin-like Growth Factor 1, IGF-1, 5' adenosine monophosphate-activated protein kinase, AMPK; angiotensin II type 1, AT1; mammalian target of rapamycin, mTOR

## References

1. Rooks, D.; Praestgaard, J.; Hariry, S.; Laurent, D.; Petricoul, O.; Perry, R.G.; Lach-Trifilieff, E.; Roubenoff, R. Treatment of Sarcopenia with Bimagrumab: Results from a Phase II, Randomized, Controlled, Proof-of-Concept Study. *J Am Geriatr Soc* **2017**, *65*, 1988-1995, doi:10.1111/jgs.14927.
2. Rooks, D.; Swan, T.; Goswami, B.; Filosa, L.A.; Bunte, O.; Panchaud, N.; Coleman, L.A.; Miller, R.R.; Garcia Garayoa, E.; Praestgaard, J., et al. Bimagrumab vs Optimized Standard of Care for Treatment of Sarcopenia in Community-Dwelling Older Adults: A Randomized Clinical Trial. *JAMA Netw Open* **2020**, *3*, e2020836, doi:10.1001/jamanetworkopen.2020.20836.
3. Heymsfield, S.B.; Coleman, L.A.; Miller, R.; Rooks, D.S.; Laurent, D.; Petricoul, O.; Praestgaard, J.; Swan, T.; Wade, T.; Perry, R.G., et al. Effect of Bimagrumab vs Placebo on Body Fat Mass Among Adults With Type 2 Diabetes and Obesity: A Phase 2 Randomized Clinical Trial. *JAMA Netw Open* **2021**, *4*, e2033457, doi:10.1001/jamanetworkopen.2020.33457.
4. Wagner, K.R.; Abdel-Hamid, H.Z.; Mah, J.K.; Campbell, C.; Guglieri, M.; Muntoni, F.; Takeshima, Y.; McDonald, C.M.; Kostera-Pruszczyk, A.; Karachunski, P., et al. Randomized phase 2 trial and open-label extension of domagrozumab in Duchenne muscular dystrophy. *Neuromuscul Disord* **2020**, *30*, 492-502, doi:10.1016/j.nmd.2020.05.002.
5. Leung, D.G.; Bocchieri, A.E.; Ahlawat, S.; Jacobs, M.A.; Parekh, V.S.; Braverman, V.; Summerton, K.; Mansour, J.; Bibat, G.; Morris, C., et al. Longitudinal functional and imaging outcome measures in FKRP limb-girdle muscular dystrophy. *BMC Neurol* **2020**, *20*, 196, doi:10.1186/s12883-020-01774-5.
6. Yarasheski, K.E.; Castaneda-Sceppa, C.; He, J.; Kawakubo, M.; Bhasin, S.; Binder, E.F.; Schroeder, E.T.; Roubenoff, R.; Azen, S.P.; Sattler, F.R. Whole-body and muscle protein metabolism are not affected by acute deviations from habitual protein intake in older men: the Hormonal Regulators of Muscle and Metabolism in Aging (HORMA) Study. *Am J Clin Nutr* **2011**, *94*, 172-181, doi:10.3945/ajcn.110.010959.
7. Borst, S.E.; Yarrow, J.F.; Conover, C.F.; Nseyo, U.; Meuleman, J.R.; Lipinska, J.A.; Braith, R.W.; Beck, D.T.; Martin, J.S.; Morrow, M., et al. Musculoskeletal and prostate effects of combined testosterone and finasteride administration in older hypogonadal men: a randomized, controlled trial. *Am J Physiol Endocrinol Metab* **2014**, *306*, E433-442, doi:10.1152/ajpendo.00592.2013.
8. Dias, J.P.; Melvin, D.; Shardell, M.; Ferrucci, L.; Chia, C.W.; Gharib, M.; Egan, J.M.; Basaria, S. Effects of Transdermal Testosterone Gel or an Aromatase Inhibitor on Prostate Volume in Older Men. *J Clin Endocrinol Metab* **2016**, *101*, 1865-1871, doi:10.1210/jc.2016-1111.
9. Papanicolaou, D.A.; Ather, S.N.; Zhu, H.; Zhou, Y.; Lutkiewicz, J.; Scott, B.B.; Chandler, J. A phase IIA randomized, placebo-controlled clinical trial to study the efficacy and safety of the selective androgen receptor modulator (SARM), MK-0773 in female participants with sarcopenia. *J Nutr Health Aging* **2013**, *17*, 533-543, doi:10.1007/s12603-013-0335-x.
10. Yuan, Y.; Lee, J.S.; Yost, S.E.; Frankel, P.H.; Ruel, C.; Egelston, C.A.; Guo, W.; Gillece, J.D.; Folkerts, M.; Reining, L., et al. A Phase II Clinical Trial of Pembrolizumab and Enobosarm in Patients with Androgen Receptor-Positive Metastatic Triple-Negative Breast Cancer. *Oncologist* **2020**, 10.1002/onco.13583, doi:10.1002/onco.13583.
11. Villareal, D.T.; Holloszy, J.O. Effect of DHEA on abdominal fat and insulin action in elderly women and men: a randomized controlled trial. *JAMA* **2004**, *292*, 2243-2248, doi:10.1001/jama.292.18.2243.
12. Chapman, I.M.; Bach, M.A.; Van Cauter, E.; Farmer, M.; Krupa, D.; Taylor, A.M.; Schilling, L.M.; Cole, K.Y.; Skiles, E.H.; Pezzoli, S.S., et al. Stimulation of the growth hormone (GH)-insulin-like growth factor I axis by daily oral administration of a GH secretagogue (MK-677) in healthy elderly subjects. *J Clin Endocrinol Metab* **1996**, *81*, 4249-4257, doi:10.1210/jcem.81.12.8954023.
13. Adunsky, A.; Chandler, J.; Heyden, N.; Lutkiewicz, J.; Scott, B.B.; Berd, Y.; Liu, N.; Papanicolaou, D.A. MK-0677 (ibutamoren mesylate) for the treatment of patients recovering from hip fracture: a multicenter, randomized, placebo-controlled phase IIb study. *Arch Gerontol Geriatr* **2011**, *53*, 183-189, doi:10.1016/j.archger.2010.10.004.
14. Cho, Y.H.; Lee, S.Y.; Kim, C.M.; Kim, N.D.; Choe, S.; Lee, C.H.; Shin, J.H. Effect of Loquat Leaf Extract on Muscle Strength, Muscle Mass, and Muscle Function in Healthy Adults: A Randomized, Double-Blinded, and Placebo-Controlled Trial. *Evid Based Complement Alternat Med* **2016**, 2016, 4301621, doi:10.1155/2016/4301621.
15. Burks, T.N.; Andres-Mateos, E.; Marx, R.; Mejias, R.; Van Erp, C.; Simmers, J.L.; Walston, J.D.; Ward, C.W.; Cohn, R.D. Losartan restores skeletal muscle remodeling and protects against disuse atrophy in sarcopenia. *Sci Transl Med* **2011**, *3*, 82ra37, doi:10.1126/scitranslmed.3002227.
16. Abadir, P.M.; Foster, D.B.; Crow, M.; Cooke, C.A.; Rucker, J.J.; Jain, A.; Smith, B.J.; Burks, T.N.; Cohn, R.D.; Fedarko, N.S., et al. Identification and characterization of a functional mitochondrial angiotensin system. *Proc Natl Acad Sci U S A* **2011**, *108*, 14849-14854, doi:10.1073/pnas.1101507108.

17. Pahor, M.; Anton, S.D.; Beavers, D.P.; Cauley, J.A.; Fielding, R.A.; Kritchevsky, S.B.; Leeuwenburgh, C.; Lewis, K.H.; Liu, C.K.; Lovato, L.C., et al. Effect of Losartan and Fish Oil on Plasma IL-6 and Mobility in Older Persons. The ENRGISE Pilot Randomized Clinical Trial. *J Gerontol A Biol Sci Med Sci* **2019**, *74*, 1612-1619, doi:10.1093/gerona/gly277.
18. Harper, S.A.; Baptista, L.C.; Roberts, L.M.; Wherry, S.J.; Boxer, R.S.; Hildreth, K.L.; Seay, R.S.; Allman, P.H.; Carter, C.S.; Aban, I., et al. Angiotensin Converting Enzyme Inhibitors Combined with Exercise for Hypertensive Seniors (The ACES Trial): Study Protocol of a Randomized Controlled Trial. *Front Med (Lausanne)* **2019**, *6*, 327, doi:10.3389/fmed.2019.00327.
